# Supplementary material for: CREB5 promotes the proliferation and self-renewal ability of glioma stem cells
Source: PubMed Central journal article supplement (PMC10901809; doi:10.1038/s41420-024-01873-z), 2024-02-28

**Original images**

**(Western blot)**

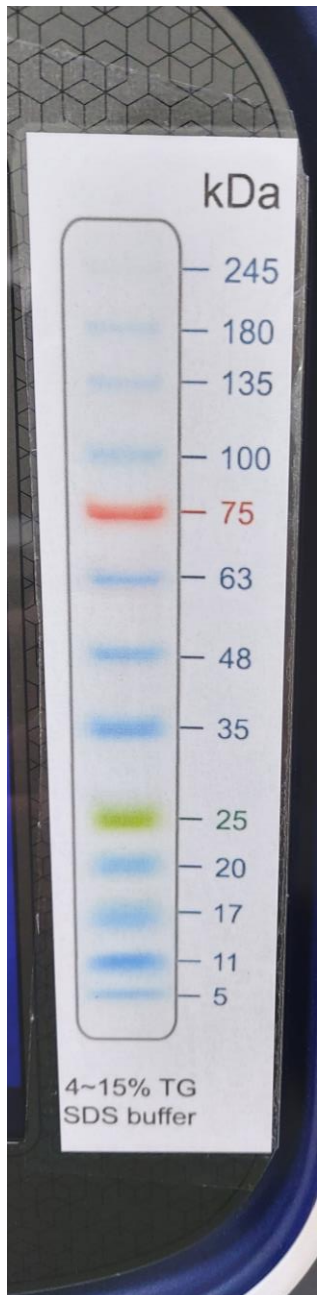

\* All protein samples were prepared on the same day at the same time.

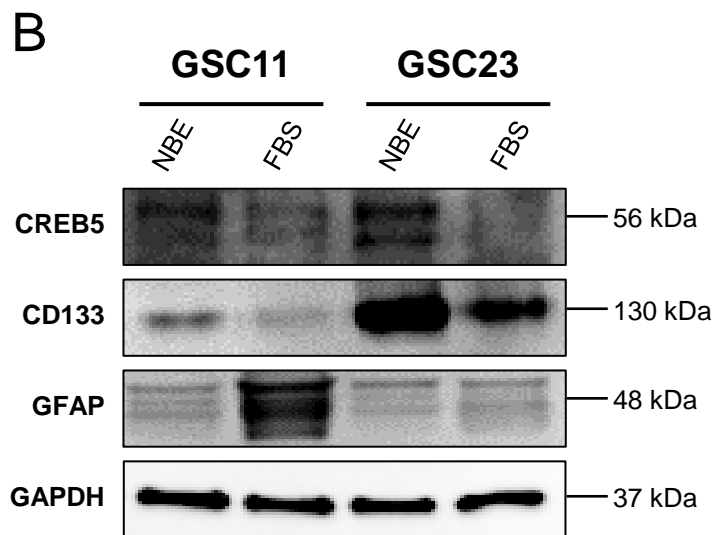

CREB5

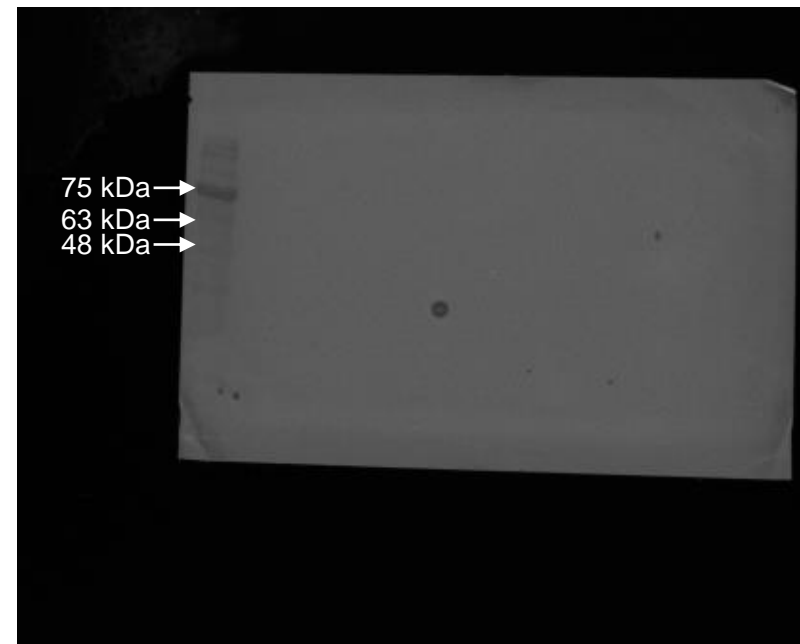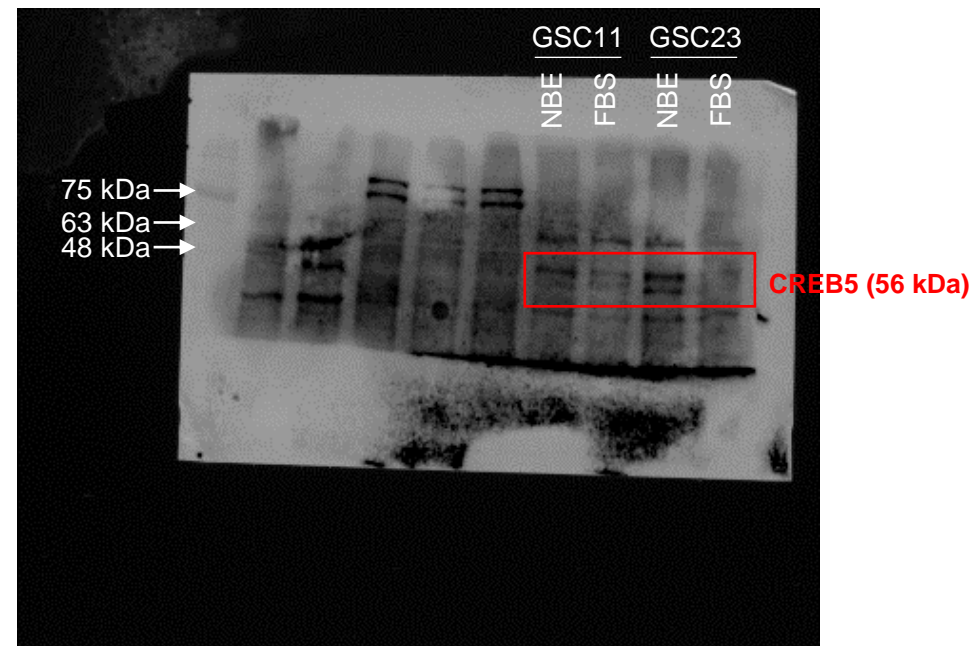

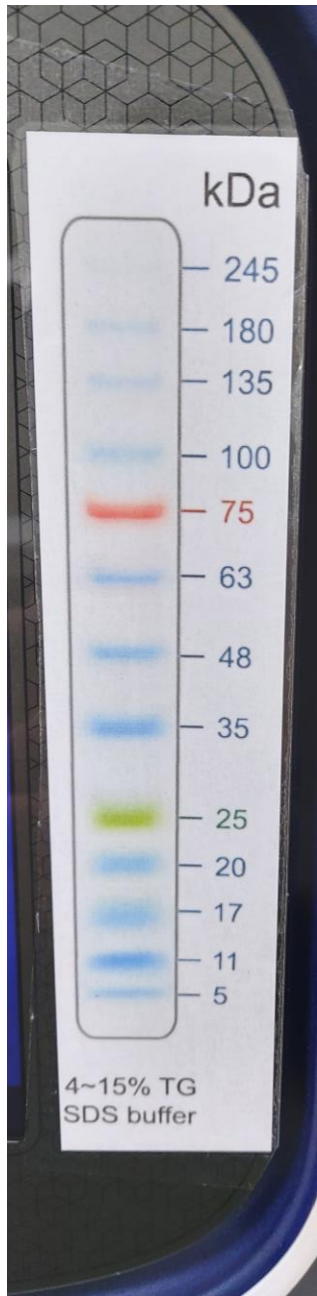

\* All protein samples were prepared on the same day at the same time.

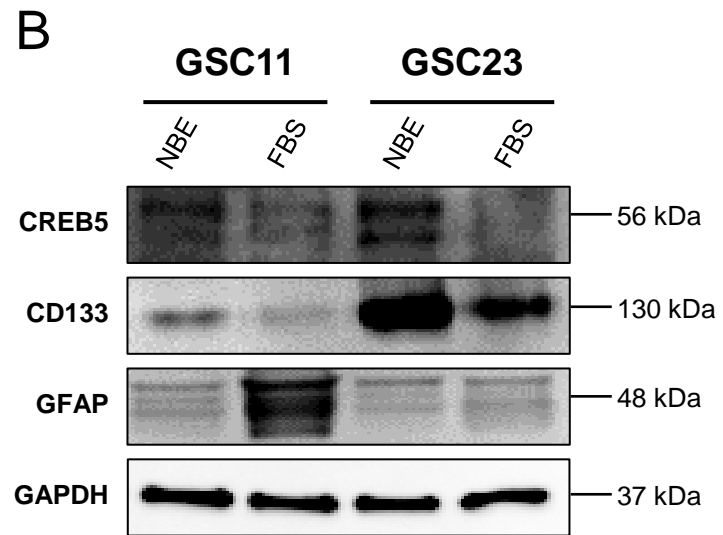

GAPDH

75 kDa →  
63 kDa →  
48 kDa →  
35 kDa →

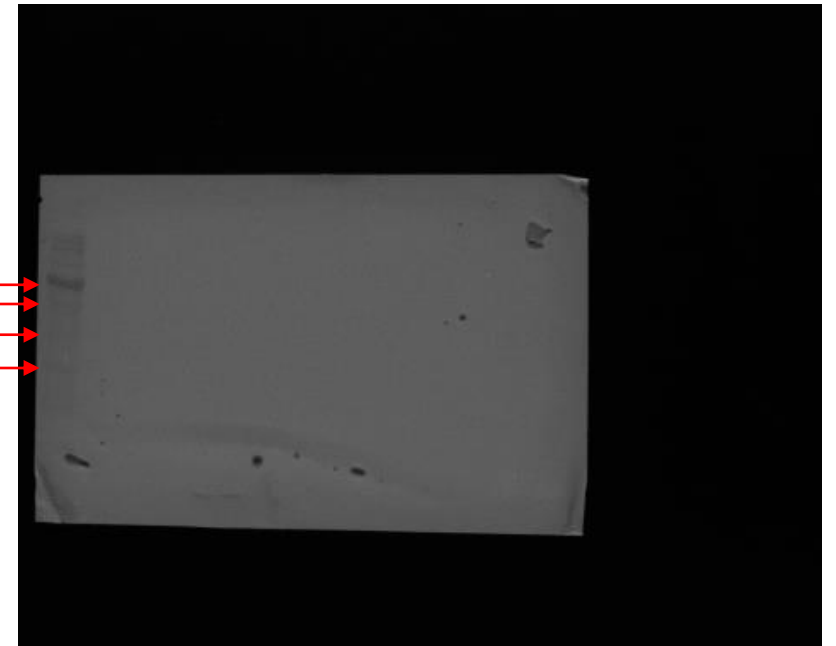

75 kDa →  
63 kDa →  
48 kDa →  
35 kDa →

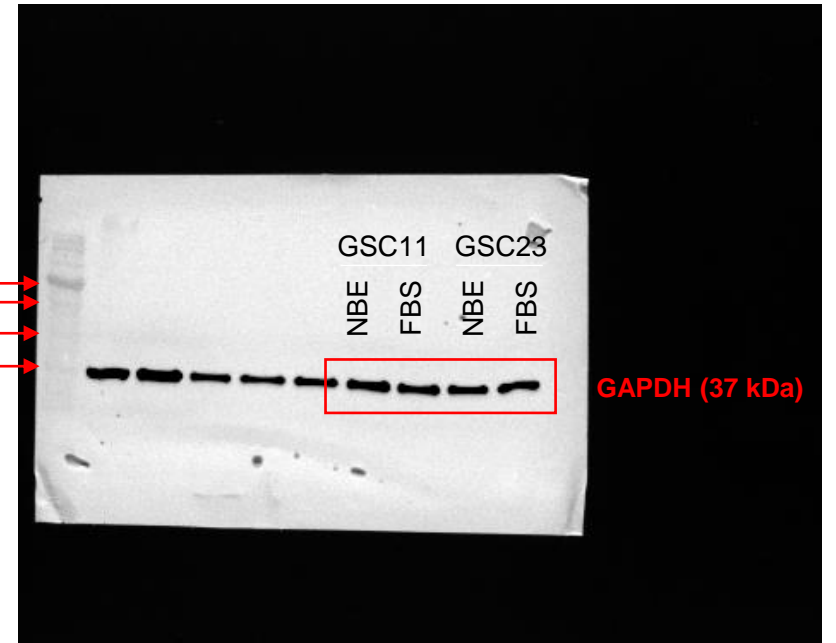



\* All protein samples were prepared on the same day at the same time.



CD133

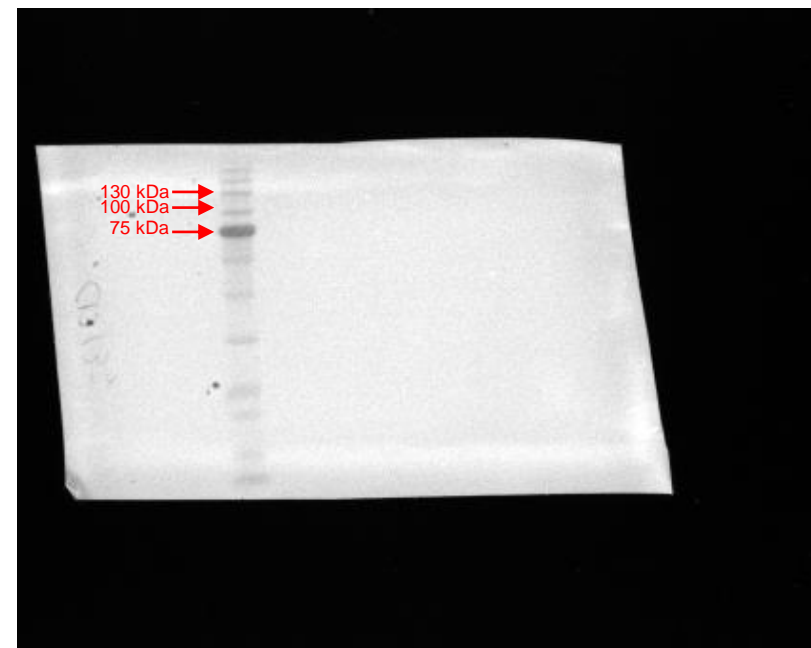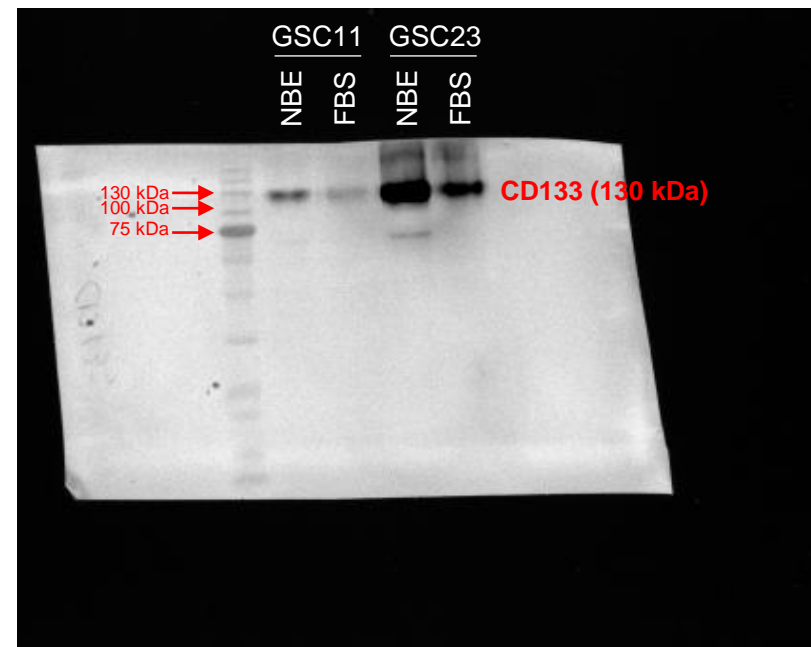



\* All protein samples were prepared on the same day at the same time.



GFAP

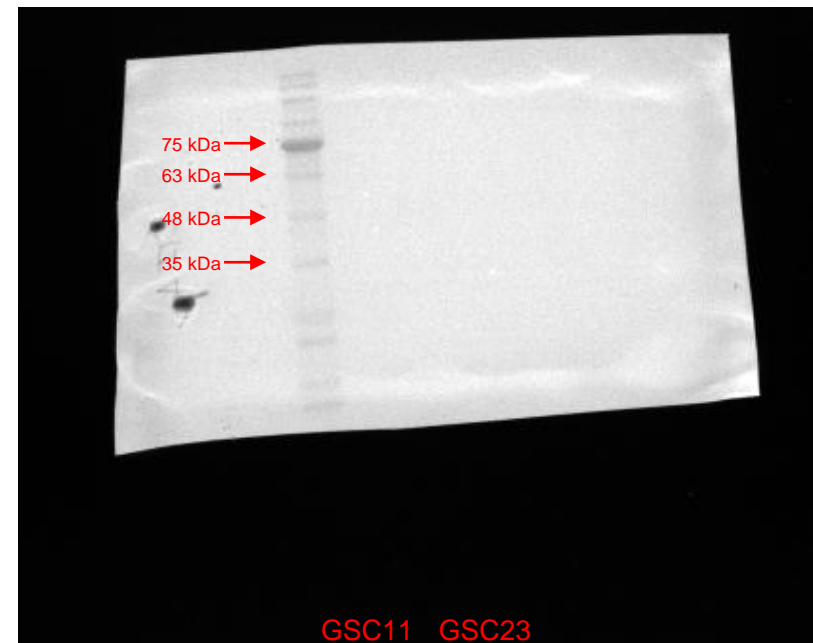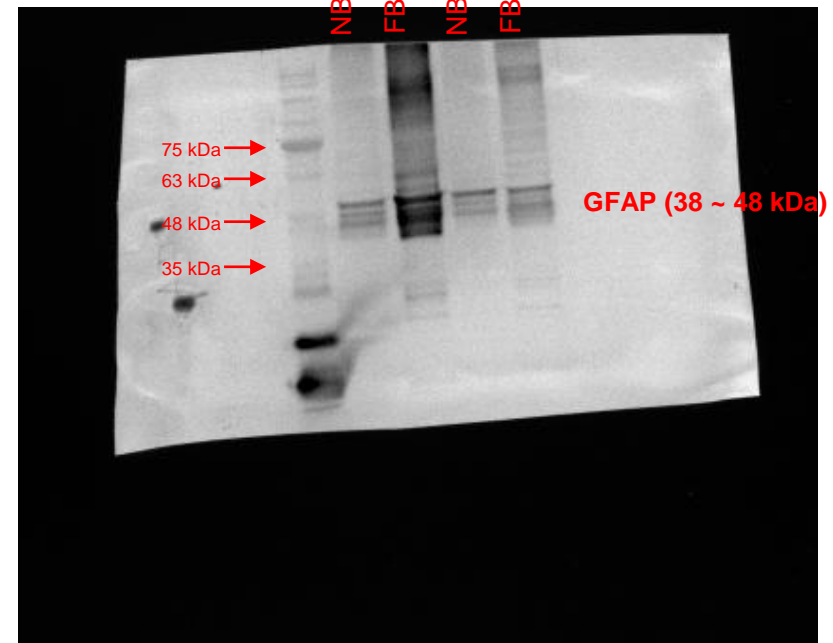

\* All protein samples were prepared on the same day at the same time.

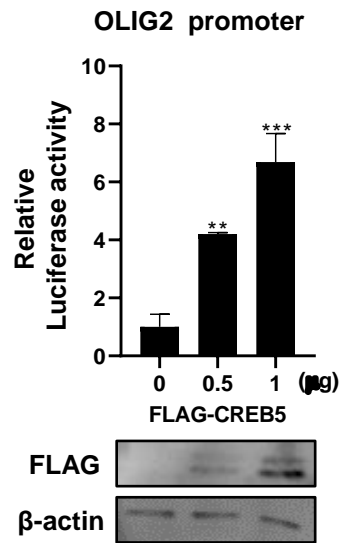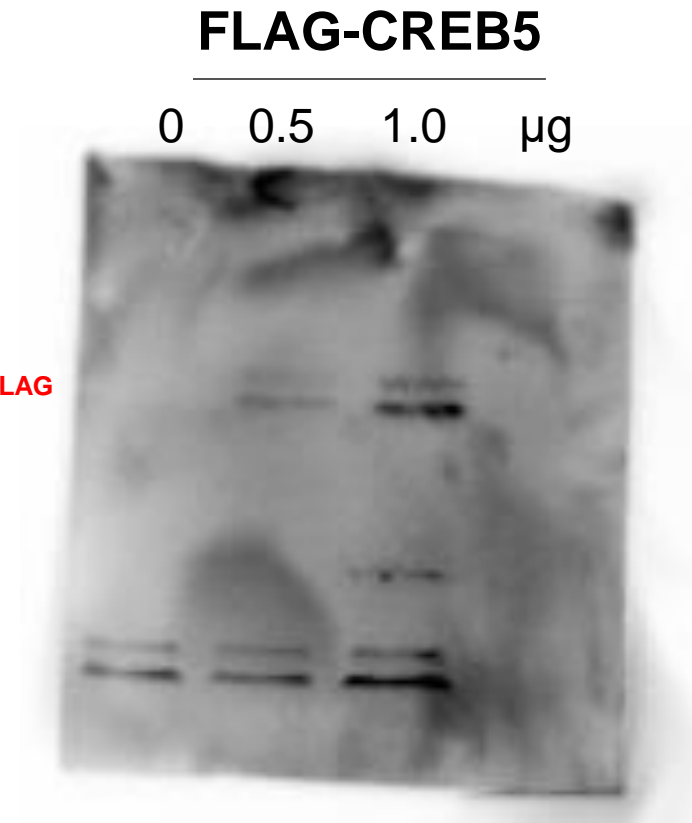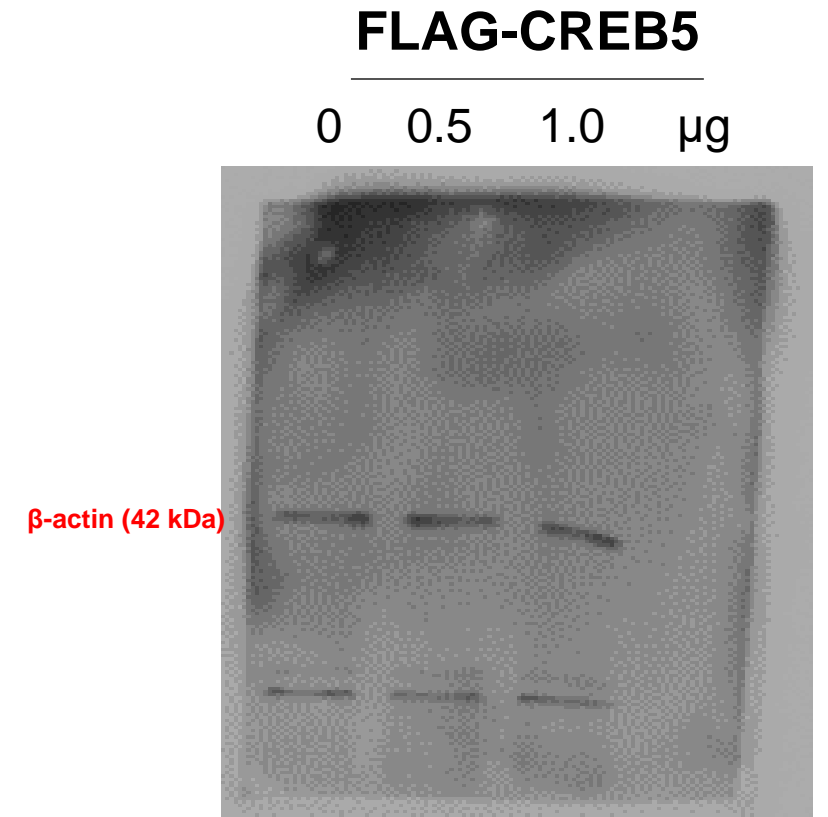

Supplement: 41420_2024_1873_MOESM5_ESM.pdf [file 41420_2024_1873_MOESM5_ESM.pdf]
